# Supplementary material for: Network based multifactorial modelling of miRNA-target interactions
Source: PeerJ. 2021 Mar 19;9:e11121. doi: 10.7717/peerj.11121 (PMC7983860; doi:10.7717/peerj.11121)
Supplement: Supplemental Information 3 — Functional annotations of genes that were found to be highly perturbing in Real networks of breast cancer data sets. miRNA:gene pairs were downloaded from miRTarBase database. [file peerj-09-11121-s003.xlsx]

## Sheet: mirtarbase_overall_terms
	category	term	p_value	genes	fold_enrichment	bonferroni	benjamini	fdr
1	GOTERM_MF_DIRECT	GO:0005515~protein binding	1.09612e-13	ENSG00000177885, ENSG00000181222, ENSG00000171940, ENSG00000114861, ENSG00000143878, ENSG00000141736, ENSG00000100345, ENSG00000166913, ENSG00000136826, ENSG00000112715, ENSG00000115306, ENSG00000104419, ENSG00000196712, ENSG00000157227, ENSG00000110092, ENSG00000148516, ENSG00000204388, ENSG00000120129, ENSG00000164902, ENSG00000107485, ENSG00000169515, ENSG00000211584, ENSG00000105810, ENSG0000…	1.59175	4.33933e-11	4.34064e-11	4.06661e-11
2	GOTERM_MF_DIRECT	GO:0098641~cadherin binding involved in cell-cell adhesion	1.35025e-11	ENSG00000172270, ENSG00000150093, ENSG00000067225, ENSG00000196586, ENSG00000128050, ENSG00000115306, ENSG00000110321, ENSG00000104419, ENSG00000108829, ENSG00000169710, ENSG00000114391, ENSG00000204388, ENSG00000166913, ENSG00000100345, ENSG00000165119, ENSG00000164924, ENSG00000167658, ENSG00000142864, ENSG00000109971	8.25371	5.34696e-09	2.67349e-09	2.50471e-09
3	GOTERM_MF_DIRECT	GO:0044822~poly(A) RNA binding	2.76486e-09	ENSG00000177885, ENSG00000181222, ENSG00000178695, ENSG00000181163, ENSG00000156508, ENSG00000110321, ENSG00000108829, ENSG00000136450, ENSG00000185650, ENSG00000100345, ENSG00000186468, ENSG00000149257, ENSG00000105372, ENSG00000142864, ENSG00000109971, ENSG00000153187, ENSG00000067225, ENSG00000198830, ENSG00000131051, ENSG00000115306, ENSG00000177954, ENSG00000147649, ENSG00000169710, ENSG0000…	3.45908	1.09488e-06	3.64961e-07	3.4192e-07
4	GOTERM_BP_DIRECT	GO:0098609~cell-cell adhesion	3.19564e-09	ENSG00000172270, ENSG00000067225, ENSG00000196586, ENSG00000128050, ENSG00000115306, ENSG00000110321, ENSG00000104419, ENSG00000108829, ENSG00000169710, ENSG00000114391, ENSG00000166913, ENSG00000165119, ENSG00000164924, ENSG00000167658, ENSG00000142864, ENSG00000109971	7.51068	5.113e-06	5.11302e-06	4.96282e-06
5	KEGG_PATHWAY	hsa04510:Focal adhesion	2.0083e-08	ENSG00000112715, ENSG00000177885, ENSG00000108821, ENSG00000150093, ENSG00000167193, ENSG00000137801, ENSG00000171862, ENSG00000204262, ENSG00000135862, ENSG00000110092, ENSG00000187498, ENSG00000101966, ENSG00000141736, ENSG00000142208, ENSG00000145675, ENSG00000140443	6.28578	3.53461e-06	1.80388e-06	1.42466e-06
6	KEGG_PATHWAY	hsa04151:PI3K-Akt signaling pathway	2.04986e-08	ENSG00000112715, ENSG00000177885, ENSG00000108821, ENSG00000105810, ENSG00000150093, ENSG00000118260, ENSG00000137801, ENSG00000171862, ENSG00000136997, ENSG00000204262, ENSG00000135862, ENSG00000110092, ENSG00000187498, ENSG00000166913, ENSG00000153094, ENSG00000142208, ENSG00000164924, ENSG00000145675, ENSG00000124762, ENSG00000140443	4.69156	3.60776e-06	1.80388e-06	1.42466e-06
7	GOTERM_BP_DIRECT	GO:0032355~response to estradiol	3.70688e-08	ENSG00000110092, ENSG00000118523, ENSG00000168610, ENSG00000108821, ENSG00000120129, ENSG00000091831, ENSG00000167658, ENSG00000003436, ENSG00000171862, ENSG00000136997	13.9794	5.93083e-05	2.77279e-05	2.69133e-05
8	KEGG_PATHWAY	hsa05206:MicroRNAs in cancer	4.24259e-08	ENSG00000112715, ENSG00000065361, ENSG00000177885, ENSG00000105810, ENSG00000113328, ENSG00000167193, ENSG00000137801, ENSG00000171862, ENSG00000136997, ENSG00000110092, ENSG00000148516, ENSG00000168610, ENSG00000134250, ENSG00000141736, ENSG00000153094, ENSG00000165119, ENSG00000130816, ENSG00000124762	5.09346	7.46692e-06	2.48898e-06	1.96573e-06
9	GOTERM_BP_DIRECT	GO:0014065~phosphatidylinositol 3-kinase signaling	5.19897e-08	ENSG00000065361, ENSG00000185650, ENSG00000141736, ENSG00000145675, ENSG00000107485, ENSG00000196712, ENSG00000140443	32.9809	8.31801e-05	2.77279e-05	2.69133e-05
10	KEGG_PATHWAY	hsa05205:Proteoglycans in cancer	1.03568e-07	ENSG00000112715, ENSG00000065361, ENSG00000177885, ENSG00000150093, ENSG00000137801, ENSG00000136997, ENSG00000110092, ENSG00000168610, ENSG00000141736, ENSG00000091831, ENSG00000142208, ENSG00000087245, ENSG00000145675, ENSG00000124762, ENSG00000140443	6.06971	1.82278e-05	4.557e-06	3.59899e-06
11	KEGG_PATHWAY	hsa05200:Pathways in cancer	1.65082e-07	ENSG00000112715, ENSG00000177885, ENSG00000105810, ENSG00000150093, ENSG00000175387, ENSG00000167193, ENSG00000171862, ENSG00000136997, ENSG00000135862, ENSG00000110092, ENSG00000168610, ENSG00000187498, ENSG00000101966, ENSG00000141736, ENSG00000142208, ENSG00000087245, ENSG00000145675, ENSG00000124762, ENSG00000140443, ENSG00000087460	4.11855	2.9054e-05	5.81088e-06	4.58927e-06
12	KEGG_PATHWAY	hsa04915:Estrogen signaling pathway	2.75278e-07	ENSG00000177885, ENSG00000185591, ENSG00000204388, ENSG00000118260, ENSG00000091831, ENSG00000142208, ENSG00000087245, ENSG00000096060, ENSG00000145675, ENSG00000109971, ENSG00000087460	8.99216	4.84478e-05	8.07483e-06	6.37728e-06
13	GOTERM_BP_DIRECT	GO:0043066~negative regulation of apoptotic process	5.15827e-07	ENSG00000112715, ENSG00000181163, ENSG00000170540, ENSG00000137801, ENSG00000171862, ENSG00000136997, ENSG00000147649, ENSG00000168610, ENSG00000134250, ENSG00000101966, ENSG00000120129, ENSG00000142208, ENSG00000165119, ENSG00000164924, ENSG00000145675, ENSG00000124762, ENSG00000140443	4.75298	0.000824984	0.000206331	0.00020027
14	KEGG_PATHWAY	hsa05222:Small cell lung cancer	7.56305e-07	ENSG00000110092, ENSG00000187498, ENSG00000105810, ENSG00000150093, ENSG00000101966, ENSG00000142208, ENSG00000145675, ENSG00000171862, ENSG00000136997, ENSG00000135862	9.52111	0.000133101	1.90157e-05	1.50181e-05
15	KEGG_PATHWAY	hsa05161:Hepatitis B	1.24079e-06	ENSG00000110092, ENSG00000177885, ENSG00000168610, ENSG00000105810, ENSG00000118260, ENSG00000166913, ENSG00000142208, ENSG00000164924, ENSG00000145675, ENSG00000171862, ENSG00000136997, ENSG00000124762	6.69761	0.000218355	2.72973e-05	2.15587e-05
16	GOTERM_BP_DIRECT	GO:0071230~cellular response to amino acid stimulus	1.65975e-06	ENSG00000148516, ENSG00000108821, ENSG00000187498, ENSG00000148053, ENSG00000087245, ENSG00000130816, ENSG00000204262	18.9465	0.00265208	0.00053112	0.000515519
17	GOTERM_BP_DIRECT	GO:0001701~in utero embryonic development	2.07455e-06	ENSG00000112715, ENSG00000175387, ENSG00000150093, ENSG00000136450, ENSG00000100345, ENSG00000185499, ENSG00000153094, ENSG00000145741, ENSG00000114861, ENSG00000136997, ENSG00000107485	7.48307	0.00331379	0.000553214	0.000536963
18	KEGG_PATHWAY	hsa04068:FoxO signaling pathway	4.55835e-06	ENSG00000110092, ENSG00000177885, ENSG00000168610, ENSG00000145391, ENSG00000175387, ENSG00000153094, ENSG00000142208, ENSG00000145675, ENSG00000171862, ENSG00000124762, ENSG00000140443	6.64346	0.000801949	8.9141e-05	7.04011e-05
19	GOTERM_BP_DIRECT	GO:0071364~cellular response to epidermal growth factor stimulus	5.33046e-06	ENSG00000108821, ENSG00000185650, ENSG00000141736, ENSG00000156508, ENSG00000142208, ENSG00000136997	23.1295	0.00849249	0.00121096	0.00117539
20	GOTERM_BP_DIRECT	GO:0010628~positive regulation of gene expression	6.58121e-06	ENSG00000136826, ENSG00000118523, ENSG00000112715, ENSG00000065361, ENSG00000153187, ENSG00000168610, ENSG00000105810, ENSG00000204388, ENSG00000148053, ENSG00000141736, ENSG00000130816, ENSG00000136997	5.82651	0.0104747	0.00121096	0.00117539
21	GOTERM_BP_DIRECT	GO:0045944~positive regulation of transcription from RNA polymerase II promoter	6.81163e-06	ENSG00000136826, ENSG00000112715, ENSG00000069667, ENSG00000175387, ENSG00000104447, ENSG00000072310, ENSG00000118260, ENSG00000177463, ENSG00000196586, ENSG00000172201, ENSG00000142192, ENSG00000114861, ENSG00000136997, ENSG00000148516, ENSG00000185591, ENSG00000168610, ENSG00000113580, ENSG00000091831, ENSG00000142208, ENSG00000165119, ENSG00000186951, ENSG00000145675, ENSG00000107485	2.98255	0.0108395	0.00121096	0.00117539
22	KEGG_PATHWAY	hsa05219:Bladder cancer	8.84419e-06	ENSG00000110092, ENSG00000112715, ENSG00000141736, ENSG00000087245, ENSG00000137801, ENSG00000136997, ENSG00000124762	13.8172	0.00155537	0.000155658	0.000122934
23	KEGG_PATHWAY	hsa05215:Prostate cancer	1.02634e-05	ENSG00000110092, ENSG00000177885, ENSG00000118260, ENSG00000141736, ENSG00000142208, ENSG00000145675, ENSG00000171862, ENSG00000124762, ENSG00000140443	8.27687	0.00180474	0.000164215	0.000129693
24	GOTERM_BP_DIRECT	GO:0000122~negative regulation of transcription from RNA polymerase II promoter	1.22355e-05	ENSG00000136826, ENSG00000112715, ENSG00000175387, ENSG00000104447, ENSG00000072310, ENSG00000172201, ENSG00000150347, ENSG00000114861, ENSG00000171940, ENSG00000136997, ENSG00000147649, ENSG00000110092, ENSG00000148516, ENSG00000168610, ENSG00000121671, ENSG00000091831, ENSG00000130816, ENSG00000186951, ENSG00000107485	3.35699	0.0193865	0.00195614	0.00189868
25	KEGG_PATHWAY	hsa05212:Pancreatic cancer	1.2357e-05	ENSG00000110092, ENSG00000112715, ENSG00000168610, ENSG00000105810, ENSG00000175387, ENSG00000141736, ENSG00000142208, ENSG00000145675	9.96054	0.00217248	0.000167294	0.000132124
26	KEGG_PATHWAY	hsa05214:Glioma	1.2357e-05	ENSG00000110092, ENSG00000177885, ENSG00000105810, ENSG00000142208, ENSG00000145675, ENSG00000171862, ENSG00000124762, ENSG00000140443	9.96054	0.00217248	0.000167294	0.000132124
27	GOTERM_BP_DIRECT	GO:0007507~heart development	1.34485e-05	ENSG00000113140, ENSG00000065361, ENSG00000104447, ENSG00000185650, ENSG00000141736, ENSG00000110321, ENSG00000186951, ENSG00000171862, ENSG00000107485, ENSG00000196712	6.95148	0.0212878	0.00195614	0.00189868
28	GOTERM_MF_DIRECT	GO:0008134~transcription factor binding	1.54578e-05	ENSG00000110092, ENSG00000148516, ENSG00000168610, ENSG00000185591, ENSG00000175387, ENSG00000069667, ENSG00000091831, ENSG00000164924, ENSG00000186951, ENSG00000145675, ENSG00000136997, ENSG00000107485	5.323	0.00610264	0.00137769	0.00129072
29	GOTERM_BP_DIRECT	GO:0043488~regulation of mRNA stability	1.593e-05	ENSG00000204388, ENSG00000185650, ENSG00000108671, ENSG00000166913, ENSG00000142208, ENSG00000164924, ENSG00000142864, ENSG00000109971	9.88055	0.0251661	0.002124	0.0020616
30	GOTERM_MF_DIRECT	GO:0001077~transcriptional activator activity, RNA polymerase II core promoter proximal region sequence-specific binding	1.77138e-05	ENSG00000136826, ENSG00000168610, ENSG00000113580, ENSG00000175387, ENSG00000072310, ENSG00000118260, ENSG00000091831, ENSG00000165119, ENSG00000186951, ENSG00000136997, ENSG00000107485	5.87184	0.00699017	0.00137769	0.00129072
31	GOTERM_BP_DIRECT	GO:0045471~response to ethanol	1.8065e-05	ENSG00000110092, ENSG00000113140, ENSG00000168610, ENSG00000145391, ENSG00000167658, ENSG00000171862, ENSG00000136997, ENSG00000107485	9.69235	0.0284905	0.00222339	0.00215807
32	GOTERM_BP_DIRECT	GO:0030198~extracellular matrix organization	2.32186e-05	ENSG00000113140, ENSG00000172270, ENSG00000108821, ENSG00000187498, ENSG00000150093, ENSG00000142192, ENSG00000137801, ENSG00000196712, ENSG00000204262, ENSG00000135862	6.49041	0.0364685	0.00265355	0.0025756
33	GOTERM_MF_DIRECT	GO:0042802~identical protein binding	2.38693e-05	ENSG00000112715, ENSG00000065361, ENSG00000177885, ENSG00000108821, ENSG00000118260, ENSG00000128050, ENSG00000142192, ENSG00000170540, ENSG00000137801, ENSG00000135821, ENSG00000171862, ENSG00000168610, ENSG00000101966, ENSG00000084234, ENSG00000141736, ENSG00000091831, ENSG00000142208, ENSG00000164924, ENSG00000140443	3.19569	0.00940784	0.00137769	0.00129072
34	GOTERM_MF_DIRECT	GO:0000978~RNA polymerase II core promoter proximal region sequence-specific DNA binding	2.43531e-05	ENSG00000175387, ENSG00000072310, ENSG00000118260, ENSG00000114861, ENSG00000171940, ENSG00000136997, ENSG00000185591, ENSG00000168610, ENSG00000113580, ENSG00000185499, ENSG00000091831, ENSG00000165119, ENSG00000186951	4.61326	0.0095976	0.00137769	0.00129072
35	KEGG_PATHWAY	hsa05220:Chronic myeloid leukemia	2.44083e-05	ENSG00000110092, ENSG00000177885, ENSG00000105810, ENSG00000142208, ENSG00000167193, ENSG00000145675, ENSG00000136997, ENSG00000124762	8.99216	0.0042867	0.000306847	0.000242339
36	GOTERM_BP_DIRECT	GO:0042493~response to drug	2.63943e-05	ENSG00000110092, ENSG00000168610, ENSG00000108821, ENSG00000072310, ENSG00000118260, ENSG00000196586, ENSG00000137801, ENSG00000171862, ENSG00000136997, ENSG00000107485, ENSG00000124762, ENSG00000087460	5.02153	0.0413522	0.0028154	0.00273269
37	GOTERM_BP_DIRECT	GO:0010595~positive regulation of endothelial cell migration	2.83855e-05	ENSG00000113140, ENSG00000112715, ENSG00000143878, ENSG00000137801, ENSG00000114861, ENSG00000107485	16.5929	0.0444015	0.00283855	0.00275517
38	KEGG_PATHWAY	hsa05213:Endometrial cancer	3.59754e-05	ENSG00000110092, ENSG00000177885, ENSG00000141736, ENSG00000142208, ENSG00000145675, ENSG00000171862, ENSG00000136997	10.8943	0.00631179	0.000422112	0.000333372
39	GOTERM_MF_DIRECT	GO:0032403~protein complex binding	3.71722e-05	ENSG00000110092, ENSG00000007168, ENSG00000113580, ENSG00000150093, ENSG00000072310, ENSG00000166913, ENSG00000115306, ENSG00000186951, ENSG00000136997, ENSG00000124762	6.11542	0.0146127	0.00184003	0.00172386
40	GOTERM_BP_DIRECT	GO:0007568~aging	4.5552e-05	ENSG00000118523, ENSG00000115461, ENSG00000177885, ENSG00000168610, ENSG00000072310, ENSG00000118260, ENSG00000142208, ENSG00000167658, ENSG00000171862	6.93884	0.0702922	0.00428725	0.00416131
41	GOTERM_MF_DIRECT	GO:0001968~fibronectin binding	4.81248e-05	ENSG00000118523, ENSG00000112715, ENSG00000115461, ENSG00000150093, ENSG00000137801	24.2265	0.0188774	0.00211749	0.00198381
42	GOTERM_BP_DIRECT	GO:0001666~response to hypoxia	6.11232e-05	ENSG00000112715, ENSG00000067225, ENSG00000118260, ENSG00000185499, ENSG00000087245, ENSG00000137801, ENSG00000186951, ENSG00000196712, ENSG00000157227	6.65645	0.0931698	0.00543317	0.00527357
43	KEGG_PATHWAY	hsa04012:ErbB signaling pathway	8.35546e-05	ENSG00000065361, ENSG00000177885, ENSG00000141736, ENSG00000142208, ENSG00000167193, ENSG00000145675, ENSG00000136997, ENSG00000124762	7.44178	0.0145986	0.000919101	0.000725881
44	GOTERM_BP_DIRECT	GO:0050679~positive regulation of epithelial cell proliferation	0.000103645	ENSG00000112715, ENSG00000141736, ENSG00000135821, ENSG00000114861, ENSG00000136997, ENSG00000135862	12.7212	0.152818	0.00872796	0.00847158
45	KEGG_PATHWAY	hsa04152:AMPK signaling pathway	0.000116393	ENSG00000110092, ENSG00000169710, ENSG00000099194, ENSG00000072310, ENSG00000118260, ENSG00000142208, ENSG00000167658, ENSG00000145675, ENSG00000140443	5.92166	0.020278	0.00115268	0.000910352
46	KEGG_PATHWAY	hsa05230:Central carbon metabolism in cancer	0.000117887	ENSG00000067225, ENSG00000141736, ENSG00000142208, ENSG00000103257, ENSG00000145675, ENSG00000171862, ENSG00000136997	8.85165	0.0205356	0.00115268	0.000910352
47	KEGG_PATHWAY	hsa04066:HIF-1 signaling pathway	0.000156022	ENSG00000112715, ENSG00000168610, ENSG00000099875, ENSG00000141736, ENSG00000142208, ENSG00000145675, ENSG00000124762, ENSG00000140443	6.74412	0.0270883	0.00144525	0.00114142
48	KEGG_PATHWAY	hsa05203:Viral carcinogenesis	0.000178878	ENSG00000110092, ENSG00000177885, ENSG00000168610, ENSG00000105810, ENSG00000067225, ENSG00000118260, ENSG00000166913, ENSG00000165119, ENSG00000164924, ENSG00000145675, ENSG00000124762	4.34255	0.0309948	0.00157413	0.0012432
49	GOTERM_BP_DIRECT	GO:0048015~phosphatidylinositol-mediated signaling	0.000181152	ENSG00000065361, ENSG00000177885, ENSG00000141736, ENSG00000142208, ENSG00000145675, ENSG00000171862, ENSG00000140443	8.4008	0.251638	0.0134439	0.013049
50	GOTERM_BP_DIRECT	GO:0009749~response to glucose	0.000188213	ENSG00000118523, ENSG00000175387, ENSG00000072310, ENSG00000137801, ENSG00000135821, ENSG00000171862	11.2246	0.260047	0.0134439	0.013049
51	GOTERM_BP_DIRECT	GO:0006367~transcription initiation from RNA polymerase II promoter	0.000189597	ENSG00000118523, ENSG00000113580, ENSG00000134250, ENSG00000181222, ENSG00000069667, ENSG00000177463, ENSG00000091831, ENSG00000186951	6.69537	0.261685	0.0134439	0.013049
52	GOTERM_BP_DIRECT	GO:0045893~positive regulation of transcription, DNA-templated	0.000195796	ENSG00000136826, ENSG00000108821, ENSG00000069667, ENSG00000145391, ENSG00000175387, ENSG00000118260, ENSG00000181163, ENSG00000136997, ENSG00000185591, ENSG00000168610, ENSG00000091831, ENSG00000186951, ENSG00000107485, ENSG00000067082	3.45819	0.268973	0.0134439	0.013049
53	GOTERM_BP_DIRECT	GO:0043154~negative regulation of cysteine-type endopeptidase activity involved in apoptotic process	0.000201658	ENSG00000136826, ENSG00000112715, ENSG00000101966, ENSG00000142208, ENSG00000137801, ENSG00000170540	11.0619	0.275799	0.0134439	0.013049
54	KEGG_PATHWAY	hsa05218:Melanoma	0.000210381	ENSG00000110092, ENSG00000105810, ENSG00000142208, ENSG00000145675, ENSG00000171862, ENSG00000124762, ENSG00000140443	7.97896	0.0363537	0.00176319	0.00139252
55	GOTERM_BP_DIRECT	GO:0038128~ERBB2 signaling pathway	0.000212608	ENSG00000065361, ENSG00000177885, ENSG00000141736, ENSG00000142208, ENSG00000145675	16.7384	0.288378	0.0136069	0.0132072
56	GOTERM_MF_DIRECT	GO:0003677~DNA binding	0.000233735	ENSG00000177200, ENSG00000181222, ENSG00000175387, ENSG00000177463, ENSG00000181163, ENSG00000150347, ENSG00000104805, ENSG00000136997, ENSG00000185591, ENSG00000168610, ENSG00000084234, ENSG00000185650, ENSG00000091831, ENSG00000153187, ENSG00000069667, ENSG00000072310, ENSG00000118260, ENSG00000198830, ENSG00000142192, ENSG00000177954, ENSG00000148516, ENSG00000113580, ENSG00000121671, ENSG0000…	2.10715	0.0884145	0.00925591	0.00867157
57	GOTERM_BP_DIRECT	GO:0051895~negative regulation of focal adhesion assembly	0.000241242	ENSG00000179051, ENSG00000137801, ENSG00000171862, ENSG00000157227	31.803	0.320252	0.0148457	0.0144096
58	GOTERM_BP_DIRECT	GO:0008285~negative regulation of cell proliferation	0.000275726	ENSG00000136826, ENSG00000135956, ENSG00000148516, ENSG00000168610, ENSG00000134250, ENSG00000105810, ENSG00000175387, ENSG00000181163, ENSG00000104419, ENSG00000171862, ENSG00000107485, ENSG00000124762	3.85491	0.356751	0.0163393	0.0158594
59	KEGG_PATHWAY	hsa04550:Signaling pathways regulating pluripotency of stem cells	0.000285325	ENSG00000136826, ENSG00000177885, ENSG00000168610, ENSG00000175387, ENSG00000172201, ENSG00000142208, ENSG00000145675, ENSG00000136997, ENSG00000140443	5.20261	0.048984	0.0022826	0.00180273
60	GOTERM_BP_DIRECT	GO:0030324~lung development	0.000317388	ENSG00000113140, ENSG00000118523, ENSG00000112715, ENSG00000175387, ENSG00000072310, ENSG00000157227	10.0431	0.398243	0.0181364	0.0176037
61	GOTERM_BP_DIRECT	GO:0008286~insulin receptor signaling pathway	0.000358199	ENSG00000177885, ENSG00000072310, ENSG00000148730, ENSG00000142208, ENSG00000145675, ENSG00000140443	9.78555	0.436293	0.0197627	0.0191822
62	GOTERM_BP_DIRECT	GO:0050900~leukocyte migration	0.000387833	ENSG00000172270, ENSG00000177885, ENSG00000108821, ENSG00000150093, ENSG00000100345, ENSG00000103257, ENSG00000145675	7.29906	0.462407	0.0206844	0.0200768
63	GOTERM_BP_DIRECT	GO:0008542~visual learning	0.000411431	ENSG00000085788, ENSG00000150093, ENSG00000118260, ENSG00000142192, ENSG00000196712	14.1347	0.482334	0.0212351	0.0206113
64	GOTERM_BP_DIRECT	GO:0051591~response to cAMP	0.000447911	ENSG00000113140, ENSG00000172270, ENSG00000108821, ENSG00000120129, ENSG00000072310	13.8274	0.511697	0.0223956	0.0217377
65	GOTERM_MF_DIRECT	GO:0001085~RNA polymerase II transcription factor binding	0.000505221	ENSG00000136826, ENSG00000147649, ENSG00000104447, ENSG00000172201, ENSG00000107485	13.4019	0.181366	0.018188	0.0170397
66	KEGG_PATHWAY	hsa05223:Non-small cell lung cancer	0.000564314	ENSG00000110092, ENSG00000177885, ENSG00000105810, ENSG00000141736, ENSG00000142208, ENSG00000145675	8.67101	0.0945718	0.0041383	0.00326832
67	KEGG_PATHWAY	hsa05221:Acute myeloid leukemia	0.000564314	ENSG00000110092, ENSG00000177885, ENSG00000168610, ENSG00000142208, ENSG00000145675, ENSG00000136997	8.67101	0.0945718	0.0041383	0.00326832
68	GOTERM_BP_DIRECT	GO:0006417~regulation of translation	0.000716757	ENSG00000099875, ENSG00000185650, ENSG00000142192, ENSG00000142208, ENSG00000116741	12.2319	0.682483	0.0337415	0.0327503
69	GOTERM_BP_DIRECT	GO:0010629~negative regulation of gene expression	0.000717006	ENSG00000136826, ENSG00000118523, ENSG00000175387, ENSG00000118260, ENSG00000091831, ENSG00000142208, ENSG00000124762	6.49989	0.682609	0.0337415	0.0327503
70	GOTERM_BP_DIRECT	GO:0045727~positive regulation of translation	0.000770624	ENSG00000141736, ENSG00000181163, ENSG00000110321, ENSG00000137801, ENSG00000167658	12.0011	0.708721	0.0352285	0.0341937
71	GOTERM_MF_DIRECT	GO:0019901~protein kinase binding	0.000793831	ENSG00000110092, ENSG00000177885, ENSG00000168610, ENSG00000072310, ENSG00000181163, ENSG00000179051, ENSG00000156508, ENSG00000164924, ENSG00000105372, ENSG00000167658, ENSG00000171862	3.68552	0.269833	0.0261964	0.0245426
72	GOTERM_BP_DIRECT	GO:0071456~cellular response to hypoxia	0.000927552	ENSG00000112715, ENSG00000069667, ENSG00000185650, ENSG00000142208, ENSG00000104419, ENSG00000171862	7.95076	0.773446	0.0412245	0.0400136
73	GOTERM_MF_DIRECT	GO:0003707~steroid hormone receptor activity	0.000985034	ENSG00000113580, ENSG00000069667, ENSG00000177463, ENSG00000091831, ENSG00000186951	11.248	0.323123	0.0300057	0.0281114
74	GOTERM_BP_DIRECT	GO:0000165~MAPK cascade	0.00104711	ENSG00000065361, ENSG00000177885, ENSG00000185650, ENSG00000141736, ENSG00000108671, ENSG00000166913, ENSG00000115306, ENSG00000136997, ENSG00000196712	4.36988	0.812927	0.0448726	0.0435545
75	GOTERM_BP_DIRECT	GO:0008284~positive regulation of cell proliferation	0.00106573	ENSG00000118523, ENSG00000112715, ENSG00000168610, ENSG00000150093, ENSG00000148053, ENSG00000181163, ENSG00000172201, ENSG00000137801, ENSG00000171862, ENSG00000136997, ENSG00000187109, ENSG00000140443	3.27585	0.818422	0.0448726	0.0435545
76	GOTERM_BP_DIRECT	GO:1904628~cellular response to phorbol 13-acetate 12-myristate	0.00123628	ENSG00000105810, ENSG00000185650, ENSG00000136997	54.5195	0.86183	0.0507192	0.0492294
77	KEGG_PATHWAY	hsa04115:p53 signaling pathway	0.00128476	ENSG00000110092, ENSG00000105810, ENSG00000113328, ENSG00000137801, ENSG00000171862, ENSG00000124762	7.24741	0.202491	0.00904468	0.00714324
78	GOTERM_MF_DIRECT	GO:0019899~enzyme binding	0.00129844	ENSG00000110092, ENSG00000204388, ENSG00000118260, ENSG00000091831, ENSG00000166913, ENSG00000142192, ENSG00000142208, ENSG00000167193, ENSG00000171862, ENSG00000109971	3.78311	0.40221	0.0367272	0.0344086
79	GOTERM_BP_DIRECT	GO:0001649~osteoblast differentiation	0.0013281	ENSG00000169710, ENSG00000153187, ENSG00000115461, ENSG00000108821, ENSG00000142208, ENSG00000196712	7.33916	0.880731	0.053124	0.0515634
80	GOTERM_MF_DIRECT	GO:0003700~transcription factor activity, sequence-specific DNA binding	0.00145472	ENSG00000136826, ENSG00000069667, ENSG00000175387, ENSG00000104447, ENSG00000072310, ENSG00000118260, ENSG00000177463, ENSG00000114861, ENSG00000171940, ENSG00000136997, ENSG00000148516, ENSG00000185591, ENSG00000168610, ENSG00000113580, ENSG00000185650, ENSG00000091831, ENSG00000186951, ENSG00000107485	2.35962	0.438133	0.0384047	0.0359801
81	GOTERM_BP_DIRECT	GO:0030574~collagen catabolic process	0.00156532	ENSG00000108821, ENSG00000187498, ENSG00000087245, ENSG00000204262, ENSG00000157227	9.93845	0.918445	0.0610857	0.0592913
82	KEGG_PATHWAY	hsa04917:Prolactin signaling pathway	0.00166735	ENSG00000110092, ENSG00000177885, ENSG00000168610, ENSG00000091831, ENSG00000142208, ENSG00000145675	6.83911	0.254498	0.0112866	0.00891389
83	KEGG_PATHWAY	hsa05146:Amoebiasis	0.00178477	ENSG00000108821, ENSG00000187498, ENSG00000145675, ENSG00000204262, ENSG00000111540, ENSG00000087460, ENSG00000135862	5.3444	0.269774	0.0116341	0.00918827
84	GOTERM_BP_DIRECT	GO:0001525~angiogenesis	0.00184071	ENSG00000118523, ENSG00000112715, ENSG00000143878, ENSG00000069667, ENSG00000100345, ENSG00000087245, ENSG00000171862, ENSG00000157227	4.56366	0.947547	0.0701222	0.0680623
85	KEGG_PATHWAY	hsa04931:Insulin resistance	0.00196366	ENSG00000168610, ENSG00000072310, ENSG00000118260, ENSG00000142208, ENSG00000186951, ENSG00000145675, ENSG00000171862	5.24542	0.292448	0.012343	0.00974818
86	KEGG_PATHWAY	hsa05145:Toxoplasmosis	0.00215584	ENSG00000168610, ENSG00000150093, ENSG00000204388, ENSG00000101966, ENSG00000142208, ENSG00000109971, ENSG00000135862	5.15005	0.316027	0.0130837	0.0103331
87	GOTERM_BP_DIRECT	GO:0008283~cell proliferation	0.00230918	ENSG00000147526, ENSG00000148516, ENSG00000168610, ENSG00000185650, ENSG00000141736, ENSG00000142208, ENSG00000135821, ENSG00000171862, ENSG00000136997, ENSG00000177954	3.47574	0.975251	0.0859231	0.0833991
88	GOTERM_BP_DIRECT	GO:0016032~viral process	0.00240468	ENSG00000177885, ENSG00000168610, ENSG00000185591, ENSG00000118260, ENSG00000181163, ENSG00000166913, ENSG00000165119, ENSG00000145675, ENSG00000109971	3.82913	0.978765	0.0874429	0.0848743
89	GOTERM_BP_DIRECT	GO:0045444~fat cell differentiation	0.00254083	ENSG00000136826, ENSG00000110092, ENSG00000072310, ENSG00000172201, ENSG00000150347	8.71316	0.982931	0.0903408	0.087687
90	GOTERM_BP_DIRECT	GO:0007623~circadian rhythm	0.00280363	ENSG00000148053, ENSG00000072310, ENSG00000118260, ENSG00000121671, ENSG00000172201	8.48081	0.988803	0.0975175	0.0946529
91	GOTERM_MF_DIRECT	GO:0004879~RNA polymerase II transcription factor activity, ligand-activated sequence-specific DNA binding	0.00282298	ENSG00000168610, ENSG00000069667, ENSG00000091831, ENSG00000186951	13.9975	0.673551	0.0698688	0.0654579
92	GOTERM_BP_DIRECT	GO:0034605~cellular response to heat	0.0029703	ENSG00000204388, ENSG00000137801, ENSG00000196712, ENSG00000124762	13.7527	0.991431	0.0994408	0.0965197
93	GOTERM_BP_DIRECT	GO:0032869~cellular response to insulin stimulus	0.00308446	ENSG00000185591, ENSG00000185650, ENSG00000142208, ENSG00000145675, ENSG00000136997	8.26053	0.992865	0.0994408	0.0965197
94	GOTERM_BP_DIRECT	GO:0048646~anatomical structure formation involved in morphogenesis	0.0031723	ENSG00000177885, ENSG00000104447, ENSG00000107485	34.6942	0.993803	0.0994408	0.0965197
95	GOTERM_BP_DIRECT	GO:0033120~positive regulation of RNA splicing	0.0031723	ENSG00000181222, ENSG00000136450, ENSG00000145675	34.6942	0.993803	0.0994408	0.0965197
96	GOTERM_BP_DIRECT	GO:0030522~intracellular receptor signaling pathway	0.00320667	ENSG00000168610, ENSG00000134250, ENSG00000069667, ENSG00000186951	13.3907	0.994136	0.0994408	0.0965197
97	GOTERM_BP_DIRECT	GO:0014066~regulation of phosphatidylinositol 3-kinase signaling	0.00323183	ENSG00000065361, ENSG00000177885, ENSG00000141736, ENSG00000142208, ENSG00000145675	8.15462	0.994368	0.0994408	0.0965197
98	GOTERM_MF_DIRECT	GO:0043560~insulin receptor substrate binding	0.00323438	ENSG00000177885, ENSG00000145675, ENSG00000140443	34.3575	0.722765	0.0725431	0.0679633
99	GOTERM_MF_DIRECT	GO:0004714~transmembrane receptor protein tyrosine kinase activity	0.00329741	ENSG00000065361, ENSG00000148053, ENSG00000141736, ENSG00000140443	13.2608	0.729622	0.0725431	0.0679633
100	GOTERM_BP_DIRECT	GO:0030199~collagen fibril organization	0.00345427	ENSG00000108821, ENSG00000149257, ENSG00000196712, ENSG00000204262	13.0474	0.996059	0.10428	0.101217
101	KEGG_PATHWAY	hsa04010:MAPK signaling pathway	0.00353173	ENSG00000177885, ENSG00000099875, ENSG00000204388, ENSG00000148053, ENSG00000120129, ENSG00000142208, ENSG00000167193, ENSG00000136997, ENSG00000196712, ENSG00000109971	3.19879	0.463497	0.0207195	0.0163637
102	GOTERM_BP_DIRECT	GO:0042060~wound healing	0.00354082	ENSG00000113140, ENSG00000065361, ENSG00000141736, ENSG00000186951, ENSG00000196712	7.95076	0.996571	0.104913	0.101831
103	GOTERM_BP_DIRECT	GO:1901215~negative regulation of neuron death	0.00371326	ENSG00000168610, ENSG00000118260, ENSG00000142208, ENSG00000186951	12.7212	0.9974	0.108022	0.104849
104	KEGG_PATHWAY	hsa04110:Cell cycle	0.0039261	ENSG00000110092, ENSG00000105810, ENSG00000175387, ENSG00000166913, ENSG00000164924, ENSG00000136997, ENSG00000124762	4.5686	0.499603	0.0222901	0.0176041
105	KEGG_PATHWAY	hsa04512:ECM-receptor interaction	0.00406481	ENSG00000108821, ENSG00000187498, ENSG00000150093, ENSG00000137801, ENSG00000204262, ENSG00000135862	5.58134	0.511719	0.0223565	0.0176565
106	GOTERM_MF_DIRECT	GO:0001046~core promoter sequence-specific DNA binding	0.00468781	ENSG00000185591, ENSG00000069667, ENSG00000091831, ENSG00000107485	11.7188	0.844442	0.0977039	0.0915357
107	GOTERM_BP_DIRECT	GO:0043434~response to peptide hormone	0.00486619	ENSG00000113140, ENSG00000172270, ENSG00000118523, ENSG00000108821	11.5647	0.999592	0.139034	0.13495
108	GOTERM_BP_DIRECT	GO:0007050~cell cycle arrest	0.00496931	ENSG00000134250, ENSG00000105810, ENSG00000110321, ENSG00000137801, ENSG00000136997, ENSG00000124762	5.41328	0.999655	0.139489	0.135392
109	GOTERM_BP_DIRECT	GO:0048009~insulin-like growth factor receptor signaling pathway	0.00516896	ENSG00000142208, ENSG00000145675, ENSG00000140443	27.2597	0.999749	0.140594	0.136464
110	GOTERM_BP_DIRECT	GO:0071363~cellular response to growth factor stimulus	0.00518439	ENSG00000136826, ENSG00000113140, ENSG00000141736, ENSG00000137801	11.3077	0.999756	0.140594	0.136464
111	KEGG_PATHWAY	hsa05162:Measles	0.00552721	ENSG00000110092, ENSG00000168610, ENSG00000105810, ENSG00000204388, ENSG00000142208, ENSG00000145675, ENSG00000109971	4.25944	0.622991	0.0294785	0.0232813
112	GOTERM_BP_DIRECT	GO:0045892~negative regulation of transcription, DNA-templated	0.00574575	ENSG00000136826, ENSG00000148516, ENSG00000175387, ENSG00000121671, ENSG00000172201, ENSG00000166913, ENSG00000150347, ENSG00000171940, ENSG00000114861, ENSG00000107485, ENSG00000109971	2.80428	0.999901	0.153058	0.148562
113	GOTERM_BP_DIRECT	GO:0006974~cellular response to DNA damage stimulus	0.00583534	ENSG00000110092, ENSG00000103264, ENSG00000145391, ENSG00000101966, ENSG00000142208, ENSG00000136997, ENSG00000124762	4.28118	0.999914	0.153058	0.148562
114	GOTERM_BP_DIRECT	GO:0001953~negative regulation of cell-matrix adhesion	0.00593386	ENSG00000137801, ENSG00000145675, ENSG00000196712	25.4424	0.999927	0.153132	0.148634
115	GOTERM_BP_DIRECT	GO:0008584~male gonad development	0.00628068	ENSG00000091831, ENSG00000150347, ENSG00000153094, ENSG00000107485, ENSG00000157227	6.7666	0.999958	0.159509	0.154824
116	KEGG_PATHWAY	hsa04910:Insulin signaling pathway	0.00660048	ENSG00000169710, ENSG00000177885, ENSG00000099875, ENSG00000072310, ENSG00000142208, ENSG00000167193, ENSG00000145675	4.10512	0.688244	0.0339048	0.0267771
117	GOTERM_MF_DIRECT	GO:0046983~protein dimerization activity	0.00670515	ENSG00000168610, ENSG00000072310, ENSG00000141736, ENSG00000172201, ENSG00000136997, ENSG00000107485	5.0391	0.930344	0.123792	0.115977
118	KEGG_PATHWAY	hsa05210:Colorectal cancer	0.00674243	ENSG00000110092, ENSG00000175387, ENSG00000142208, ENSG00000145675, ENSG00000136997	6.52657	0.695987	0.0339048	0.0267771
119	GOTERM_MF_DIRECT	GO:0044212~transcription regulatory region DNA binding	0.00684873	ENSG00000136826, ENSG00000168610, ENSG00000185591, ENSG00000118260, ENSG00000150347, ENSG00000171940, ENSG00000107485	4.14011	0.934219	0.123792	0.115977
120	GOTERM_MF_DIRECT	GO:0001190~transcriptional activator activity, RNA polymerase II transcription factor binding	0.00687734	ENSG00000136826, ENSG00000118260, ENSG00000186951	23.6208	0.934965	0.123792	0.115977
121	GOTERM_BP_DIRECT	GO:0006366~transcription from RNA polymerase II promoter	0.00693432	ENSG00000136826, ENSG00000113580, ENSG00000181222, ENSG00000175387, ENSG00000104447, ENSG00000118260, ENSG00000091831, ENSG00000165119, ENSG00000145741, ENSG00000136997, ENSG00000107485	2.72775	0.999985	0.173358	0.168266
122	GOTERM_BP_DIRECT	GO:0042542~response to hydrogen peroxide	0.00735512	ENSG00000158615, ENSG00000108821, ENSG00000120129, ENSG00000167658	9.97742	0.999993	0.181049	0.175731
123	GOTERM_BP_DIRECT	GO:0060749~mammary gland alveolus development	0.00760786	ENSG00000110092, ENSG00000112715, ENSG00000091831	22.4492	0.999995	0.184433	0.179015
124	GOTERM_BP_DIRECT	GO:0000082~G1/S transition of mitotic cell cycle	0.0083459	ENSG00000110092, ENSG00000105810, ENSG00000150093, ENSG00000172201, ENSG00000124762	6.23589	0.999998	0.197296	0.191501
125	KEGG_PATHWAY	hsa05211:Renal cell carcinoma	0.00839681	ENSG00000112715, ENSG00000177885, ENSG00000142208, ENSG00000167193, ENSG00000145675	6.13102	0.773289	0.0410511	0.032421
126	GOTERM_BP_DIRECT	GO:0010971~positive regulation of G2/M transition of mitotic cell cycle	0.00851541	ENSG00000110092, ENSG00000179051, ENSG00000142192	21.202	0.999999	0.197296	0.191501
127	GOTERM_BP_DIRECT	GO:0048146~positive regulation of fibroblast proliferation	0.00861358	ENSG00000105810, ENSG00000091831, ENSG00000136997, ENSG00000124762	9.42312	0.999999	0.197296	0.191501
128	GOTERM_BP_DIRECT	GO:0002576~platelet degranulation	0.00863171	ENSG00000113140, ENSG00000112715, ENSG00000084234, ENSG00000142192, ENSG00000137801	6.17535	0.999999	0.197296	0.191501
129	GOTERM_MF_DIRECT	GO:0042826~histone deacetylase binding	0.00863557	ENSG00000136826, ENSG00000110092, ENSG00000185591, ENSG00000204388, ENSG00000166913	6.17537	0.96776	0.144203	0.135099
130	GOTERM_MF_DIRECT	GO:0008201~heparin binding	0.00873958	ENSG00000118523, ENSG00000112715, ENSG00000007168, ENSG00000084234, ENSG00000142192, ENSG00000137801	4.72416	0.969072	0.144203	0.135099
131	GOTERM_BP_DIRECT	GO:0007165~signal transduction	0.00884777	ENSG00000158604, ENSG00000065361, ENSG00000118260, ENSG00000181163, ENSG00000171940, ENSG00000196712, ENSG00000113140, ENSG00000115461, ENSG00000168610, ENSG00000113580, ENSG00000141736, ENSG00000091831, ENSG00000142208, ENSG00000165119, ENSG00000164924, ENSG00000145675, ENSG00000107485, ENSG00000140443	1.97228	0.999999	0.199386	0.193529
132	GOTERM_BP_DIRECT	GO:0060548~negative regulation of cell death	0.00905935	ENSG00000110108, ENSG00000118523, ENSG00000204388, ENSG00000136997	9.25179	1	0.200388	0.194501
133	GOTERM_BP_DIRECT	GO:0043523~regulation of neuron apoptotic process	0.00946894	ENSG00000181163, ENSG00000109654, ENSG00000107485	20.0861	1	0.200388	0.194501
134	GOTERM_BP_DIRECT	GO:0010975~regulation of neuron projection development	0.00946894	ENSG00000142208, ENSG00000171862, ENSG00000107485	20.0861	1	0.200388	0.194501
135	GOTERM_BP_DIRECT	GO:0043536~positive regulation of blood vessel endothelial cell migration	0.00946894	ENSG00000112715, ENSG00000142208, ENSG00000137801	20.0861	1	0.200388	0.194501
136	GOTERM_BP_DIRECT	GO:0021987~cerebral cortex development	0.00951841	ENSG00000147526, ENSG00000007168, ENSG00000148053, ENSG00000196712	9.08658	1	0.200388	0.194501
137	GOTERM_BP_DIRECT	GO:0032922~circadian regulation of gene expression	0.00999083	ENSG00000153187, ENSG00000069667, ENSG00000121671, ENSG00000186951	8.92717	1	0.20494	0.19892
138	GOTERM_BP_DIRECT	GO:0043401~steroid hormone mediated signaling pathway	0.00999083	ENSG00000069667, ENSG00000177463, ENSG00000091831, ENSG00000186951	8.92717	1	0.20494	0.19892
139	GOTERM_BP_DIRECT	GO:0051592~response to calcium ion	0.0104767	ENSG00000110092, ENSG00000113140, ENSG00000120129, ENSG00000137801	8.77325	1	0.212186	0.205953
140	GOTERM_MF_DIRECT	GO:0030332~cyclin binding	0.0106676	ENSG00000103264, ENSG00000105810, ENSG00000124762	18.8966	0.985694	0.168975	0.158307
141	GOTERM_BP_DIRECT	GO:0071356~cellular response to tumor necrosis factor	0.0108127	ENSG00000108821, ENSG00000069667, ENSG00000185650, ENSG00000137801, ENSG00000107485	5.78237	1	0.216254	0.209902
142	GOTERM_MF_DIRECT	GO:0003723~RNA binding	0.0113405	ENSG00000153187, ENSG00000113580, ENSG00000114391, ENSG00000136450, ENSG00000181163, ENSG00000131051, ENSG00000165119, ENSG00000110321, ENSG00000164902, ENSG00000130816, ENSG00000108256	2.53337	0.989073	0.172724	0.16182
143	GOTERM_BP_DIRECT	GO:0048661~positive regulation of smooth muscle cell proliferation	0.011489	ENSG00000142208, ENSG00000137801, ENSG00000114861, ENSG00000136997	8.48081	1	0.226942	0.220276
144	GOTERM_MF_DIRECT	GO:0016301~kinase activity	0.0121399	ENSG00000148053, ENSG00000067225, ENSG00000141736, ENSG00000142208, ENSG00000164924, ENSG00000145675, ENSG00000124762	3.6591	0.992068	0.174103	0.163111
145	GOTERM_MF_DIRECT	GO:0003682~chromatin binding	0.0123103	ENSG00000148516, ENSG00000145391, ENSG00000175387, ENSG00000104447, ENSG00000072310, ENSG00000091831, ENSG00000130816, ENSG00000114861, ENSG00000107485	2.89974	0.992592	0.174103	0.163111
146	GOTERM_BP_DIRECT	GO:0007219~Notch signaling pathway	0.0125704	ENSG00000134250, ENSG00000105810, ENSG00000142192, ENSG00000105372, ENSG00000136997	5.53096	1	0.24232	0.235202
147	GOTERM_BP_DIRECT	GO:0030168~platelet activation	0.0125704	ENSG00000108821, ENSG00000143878, ENSG00000142208, ENSG00000164924, ENSG00000145675	5.53096	1	0.24232	0.235202
148	GOTERM_MF_DIRECT	GO:0046934~phosphatidylinositol-4,5-bisphosphate 3-kinase activity	0.0128934	ENSG00000065361, ENSG00000177885, ENSG00000141736, ENSG00000145675	8.12759	0.994136	0.176062	0.164947
149	KEGG_PATHWAY	hsa04919:Thyroid hormone signaling pathway	0.0129582	ENSG00000110092, ENSG00000134250, ENSG00000091831, ENSG00000142208, ENSG00000145675, ENSG00000136997	4.2224	0.899293	0.0616388	0.0486806
150	GOTERM_MF_DIRECT	GO:0019903~protein phosphatase binding	0.0134615	ENSG00000177885, ENSG00000168610, ENSG00000141736, ENSG00000145675	7.99858	0.995332	0.177692	0.166474
151	KEGG_PATHWAY	hsa04015:Rap1 signaling pathway	0.0138829	ENSG00000112715, ENSG00000150093, ENSG00000142208, ENSG00000167193, ENSG00000137801, ENSG00000145675, ENSG00000140443, ENSG00000087460	3.08303	0.914609	0.0643	0.0507824
152	GOTERM_BP_DIRECT	GO:0035019~somatic stem cell population maintenance	0.0142591	ENSG00000136826, ENSG00000168610, ENSG00000181222, ENSG00000175387	7.82844	1	0.265041	0.257255
153	GOTERM_BP_DIRECT	GO:0043627~response to estrogen	0.0142591	ENSG00000110092, ENSG00000091831, ENSG00000107485, ENSG00000157227	7.82844	1	0.265041	0.257255
154	GOTERM_BP_DIRECT	GO:0043087~regulation of GTPase activity	0.0142591	ENSG00000007168, ENSG00000148053, ENSG00000167193, ENSG00000196712	7.82844	1	0.265041	0.257255
155	GOTERM_BP_DIRECT	GO:0030335~positive regulation of cell migration	0.0146976	ENSG00000112715, ENSG00000108821, ENSG00000137801, ENSG00000145675, ENSG00000157227, ENSG00000140443	4.14822	1	0.265041	0.257255
156	GOTERM_BP_DIRECT	GO:0071353~cellular response to interleukin-4	0.0149002	ENSG00000169710, ENSG00000123416, ENSG00000107485	15.9015	1	0.265041	0.257255
157	GOTERM_BP_DIRECT	GO:0007422~peripheral nervous system development	0.0149002	ENSG00000065361, ENSG00000141736, ENSG00000196712	15.9015	1	0.265041	0.257255
158	GOTERM_BP_DIRECT	GO:0010951~negative regulation of endopeptidase activity	0.0149085	ENSG00000084234, ENSG00000142192, ENSG00000142208, ENSG00000149257, ENSG00000003436	5.2567	1	0.265041	0.257255
159	GOTERM_BP_DIRECT	GO:0072369~regulation of lipid transport by positive regulation of transcription from RNA polymerase II promoter	0.0155423	ENSG00000165119, ENSG00000186951	127.212	1	0.2703	0.26236
160	GOTERM_BP_DIRECT	GO:0055025~positive regulation of cardiac muscle tissue development	0.0155423	ENSG00000065361, ENSG00000118260	127.212	1	0.2703	0.26236
161	GOTERM_MF_DIRECT	GO:0005201~extracellular matrix structural constituent	0.0158753	ENSG00000108821, ENSG00000187498, ENSG00000204262, ENSG00000135862	7.52105	0.998231	0.202794	0.189992
162	GOTERM_BP_DIRECT	GO:0048709~oligodendrocyte differentiation	0.016114	ENSG00000136450, ENSG00000148053, ENSG00000141736	15.2655	1	0.275301	0.267214
163	GOTERM_BP_DIRECT	GO:0051726~regulation of cell cycle	0.0161739	ENSG00000168610, ENSG00000150093, ENSG00000113328, ENSG00000171862, ENSG00000109971	5.12952	1	0.275301	0.267214
164	KEGG_PATHWAY	hsa05169:Epstein-Barr virus infection	0.0163856	ENSG00000168610, ENSG00000108671, ENSG00000142208, ENSG00000145675, ENSG00000136997, ENSG00000124762	3.98014	0.945402	0.0739454	0.0584001
165	GOTERM_BP_DIRECT	GO:0001958~endochondral ossification	0.0173687	ENSG00000108821, ENSG00000157227, ENSG00000087460	14.6783	1	0.282908	0.274597
166	GOTERM_BP_DIRECT	GO:0002053~positive regulation of mesenchymal cell proliferation	0.0173687	ENSG00000112715, ENSG00000114861, ENSG00000136997	14.6783	1	0.282908	0.274597
167	GOTERM_BP_DIRECT	GO:0007265~Ras protein signal transduction	0.0173758	ENSG00000177885, ENSG00000130816, ENSG00000196712, ENSG00000124762	7.26926	1	0.282908	0.274597
168	GOTERM_BP_DIRECT	GO:0071300~cellular response to retinoic acid	0.0173758	ENSG00000136826, ENSG00000108821, ENSG00000185499, ENSG00000136997	7.26926	1	0.282908	0.274597
169	GOTERM_BP_DIRECT	GO:0001934~positive regulation of protein phosphorylation	0.0175049	ENSG00000110092, ENSG00000112715, ENSG00000148053, ENSG00000141736, ENSG00000142208	5.00835	1	0.282908	0.274597
170	GOTERM_MF_DIRECT	GO:0050840~extracellular matrix binding	0.017695	ENSG00000113140, ENSG00000112715, ENSG00000137801	14.5359	0.99915	0.218975	0.205151
171	GOTERM_BP_DIRECT	GO:0000226~microtubule cytoskeleton organization	0.0180411	ENSG00000147526, ENSG00000007168, ENSG00000123416, ENSG00000169515	7.16688	1	0.288657	0.280178
172	GOTERM_MF_DIRECT	GO:0019838~growth factor binding	0.0190131	ENSG00000065361, ENSG00000120129, ENSG00000141736	13.9975	0.9995	0.221447	0.207467
173	GOTERM_MF_DIRECT	GO:0001103~RNA polymerase II repressing transcription factor binding	0.0190131	ENSG00000168610, ENSG00000185591, ENSG00000186951	13.9975	0.9995	0.221447	0.207467
174	KEGG_PATHWAY	hsa04350:TGF-beta signaling pathway	0.0190664	ENSG00000185591, ENSG00000175387, ENSG00000172201, ENSG00000137801, ENSG00000136997	4.81723	0.966227	0.0838924	0.0662559
175	GOTERM_BP_DIRECT	GO:0007528~neuromuscular junction development	0.0199978	ENSG00000187498, ENSG00000148053, ENSG00000141736	13.6299	1	0.313691	0.304476
176	GOTERM_BP_DIRECT	GO:2000145~regulation of cell motility	0.0199978	ENSG00000065361, ENSG00000105810, ENSG00000141736	13.6299	1	0.313691	0.304476
177	GOTERM_BP_DIRECT	GO:0034976~response to endoplasmic reticulum stress	0.0208429	ENSG00000153094, ENSG00000137801, ENSG00000167658, ENSG00000145675	6.78465	1	0.319747	0.310354
178	KEGG_PATHWAY	hsa04611:Platelet activation	0.0209887	ENSG00000108821, ENSG00000150093, ENSG00000142208, ENSG00000145675, ENSG00000204262, ENSG00000087460	3.7352	0.976087	0.0900978	0.0711568
179	GOTERM_BP_DIRECT	GO:0097421~liver regeneration	0.0213708	ENSG00000110092, ENSG00000136450, ENSG00000136997	13.1599	1	0.319747	0.310354
180	GOTERM_BP_DIRECT	GO:0001937~negative regulation of endothelial cell proliferation	0.0213708	ENSG00000113140, ENSG00000137801, ENSG00000196712	13.1599	1	0.319747	0.310354
181	GOTERM_MF_DIRECT	GO:0043565~sequence-specific DNA binding	0.0214713	ENSG00000185591, ENSG00000113580, ENSG00000104447, ENSG00000069667, ENSG00000118260, ENSG00000177463, ENSG00000091831, ENSG00000186951, ENSG00000114861, ENSG00000136997	2.432	0.999815	0.242932	0.227596
182	GOTERM_BP_DIRECT	GO:0022617~extracellular matrix disassembly	0.0215786	ENSG00000172270, ENSG00000087245, ENSG00000157227, ENSG00000135862	6.69537	1	0.319747	0.310354
183	GOTERM_BP_DIRECT	GO:0050821~protein stabilization	0.0219005	ENSG00000204388, ENSG00000118260, ENSG00000145675, ENSG00000171862, ENSG00000124762	4.67692	1	0.319747	0.310354
184	GOTERM_BP_DIRECT	GO:0006357~regulation of transcription from RNA polymerase II promoter	0.022331	ENSG00000112715, ENSG00000148516, ENSG00000168610, ENSG00000072310, ENSG00000118260, ENSG00000172201, ENSG00000165119, ENSG00000167193, ENSG00000114861	2.59617	1	0.319747	0.310354
185	GOTERM_BP_DIRECT	GO:0006413~translational initiation	0.0224212	ENSG00000114391, ENSG00000186468, ENSG00000110321, ENSG00000105372, ENSG00000177954	4.64278	1	0.319747	0.310354
186	GOTERM_BP_DIRECT	GO:1900740~positive regulation of protein insertion into mitochondrial membrane involved in apoptotic signaling pathway	0.022782	ENSG00000166913, ENSG00000153094, ENSG00000164924	12.7212	1	0.319747	0.310354
187	GOTERM_BP_DIRECT	GO:0044344~cellular response to fibroblast growth factor stimulus	0.022782	ENSG00000108821, ENSG00000185650, ENSG00000136997	12.7212	1	0.319747	0.310354
188	GOTERM_BP_DIRECT	GO:0090004~positive regulation of establishment of protein localization to plasma membrane	0.022782	ENSG00000150093, ENSG00000142208, ENSG00000145675	12.7212	1	0.319747	0.310354
189	GOTERM_BP_DIRECT	GO:0060325~face morphogenesis	0.022782	ENSG00000108821, ENSG00000150347, ENSG00000087245	12.7212	1	0.319747	0.310354
190	GOTERM_BP_DIRECT	GO:2000379~positive regulation of reactive oxygen species metabolic process	0.022782	ENSG00000177885, ENSG00000137801, ENSG00000124762	12.7212	1	0.319747	0.310354
191	KEGG_PATHWAY	hsa05160:Hepatitis C	0.0229127	ENSG00000177885, ENSG00000168610, ENSG00000142208, ENSG00000186951, ENSG00000145675, ENSG00000124762	3.65095	0.983085	0.0960149	0.07583
192	GOTERM_BP_DIRECT	GO:0070141~response to UV-A	0.0232233	ENSG00000110092, ENSG00000142208	84.8081	1	0.320321	0.310911
193	GOTERM_BP_DIRECT	GO:0071409~cellular response to cycloheximide	0.0232233	ENSG00000136826, ENSG00000136997	84.8081	1	0.320321	0.310911
194	GOTERM_BP_DIRECT	GO:0050728~negative regulation of inflammatory response	0.0238701	ENSG00000136826, ENSG00000069667, ENSG00000186951, ENSG00000107485	6.44112	1	0.323073	0.313583
195	GOTERM_BP_DIRECT	GO:0048701~embryonic cranial skeleton morphogenesis	0.0242305	ENSG00000175387, ENSG00000157227, ENSG00000087460	12.3109	1	0.323073	0.313583
196	GOTERM_BP_DIRECT	GO:1990090~cellular response to nerve growth factor stimulus	0.0242305	ENSG00000118260, ENSG00000142192, ENSG00000142208	12.3109	1	0.323073	0.313583
197	GOTERM_BP_DIRECT	GO:0071479~cellular response to ionizing radiation	0.0242305	ENSG00000177885, ENSG00000143878, ENSG00000124762	12.3109	1	0.323073	0.313583
198	GOTERM_MF_DIRECT	GO:0003690~double-stranded DNA binding	0.0261256	ENSG00000185591, ENSG00000175387, ENSG00000118260, ENSG00000136997	6.22112	0.999972	0.280371	0.26267
199	GOTERM_MF_DIRECT	GO:0031625~ubiquitin protein ligase binding	0.0261962	ENSG00000181222, ENSG00000175387, ENSG00000204388, ENSG00000123416, ENSG00000164924, ENSG00000109971, ENSG00000124762	3.07262	0.999973	0.280371	0.26267
200	GOTERM_BP_DIRECT	GO:0006468~protein phosphorylation	0.0265782	ENSG00000110092, ENSG00000105810, ENSG00000175387, ENSG00000099875, ENSG00000118260, ENSG00000141736, ENSG00000142192, ENSG00000142208, ENSG00000145675	2.51077	1	0.351447	0.341124
201	GOTERM_BP_DIRECT	GO:0060070~canonical Wnt signaling pathway	0.0271228	ENSG00000136826, ENSG00000110092, ENSG00000171862, ENSG00000136997	6.1307	1	0.354306	0.343898
202	GOTERM_BP_DIRECT	GO:0043491~protein kinase B signaling	0.0272373	ENSG00000185650, ENSG00000142208, ENSG00000171862	11.5647	1	0.354306	0.343898
203	GOTERM_MF_DIRECT	GO:0043531~ADP binding	0.0277391	ENSG00000067225, ENSG00000100345, ENSG00000196586	11.4525	0.999985	0.289071	0.270822
204	GOTERM_BP_DIRECT	GO:0030307~positive regulation of cell growth	0.0279711	ENSG00000141736, ENSG00000110321, ENSG00000142208, ENSG00000157227	6.05772	1	0.358031	0.347514
205	GOTERM_BP_DIRECT	GO:0051897~positive regulation of protein kinase B signaling	0.0279711	ENSG00000147649, ENSG00000115461, ENSG00000137801, ENSG00000107485	6.05772	1	0.358031	0.347514
206	GOTERM_BP_DIRECT	GO:0045787~positive regulation of cell cycle	0.0287942	ENSG00000110092, ENSG00000153094, ENSG00000136997	11.2246	1	0.362761	0.352105
207	GOTERM_BP_DIRECT	GO:0097192~extrinsic apoptotic signaling pathway in absence of ligand	0.0287942	ENSG00000065361, ENSG00000099875, ENSG00000153094	11.2246	1	0.362761	0.352105
208	GOTERM_MF_DIRECT	GO:0070888~E-box binding	0.0293233	ENSG00000148516, ENSG00000136997, ENSG00000107485	11.1157	0.999992	0.293671	0.275132
209	GOTERM_BP_DIRECT	GO:0001822~kidney development	0.0297099	ENSG00000112715, ENSG00000150347, ENSG00000153094, ENSG00000107485	5.91684	1	0.371374	0.360465
210	GOTERM_BP_DIRECT	GO:0043065~positive regulation of apoptotic process	0.0302838	ENSG00000143878, ENSG00000150093, ENSG00000120129, ENSG00000118260, ENSG00000153094, ENSG00000142208, ENSG00000196712	2.96828	1	0.373876	0.362894
211	GOTERM_BP_DIRECT	GO:0010748~negative regulation of plasma membrane long-chain fatty acid transport	0.0308448	ENSG00000142208, ENSG00000137801	63.6061	1	0.373876	0.362894
212	GOTERM_BP_DIRECT	GO:0000320~re-entry into mitotic cell cycle	0.0308448	ENSG00000110092, ENSG00000136997	63.6061	1	0.373876	0.362894
213	GOTERM_BP_DIRECT	GO:0031077~post-embryonic camera-type eye development	0.0308448	ENSG00000136826, ENSG00000112715	63.6061	1	0.373876	0.362894
214	GOTERM_MF_DIRECT	GO:0043125~ErbB-3 class receptor binding	0.031147	ENSG00000141736, ENSG00000145675	62.9888	0.999996	0.293671	0.275132
215	GOTERM_MF_DIRECT	GO:0046914~transition metal ion binding	0.031147	ENSG00000084234, ENSG00000142192	62.9888	0.999996	0.293671	0.275132
216	GOTERM_MF_DIRECT	GO:0035014~phosphatidylinositol 3-kinase regulator activity	0.031147	ENSG00000136826, ENSG00000145675	62.9888	0.999996	0.293671	0.275132
217	KEGG_PATHWAY	hsa04630:Jak-STAT signaling pathway	0.0317413	ENSG00000110092, ENSG00000177885, ENSG00000168610, ENSG00000142208, ENSG00000145675, ENSG00000136997	3.3488	0.996576	0.129817	0.102526
218	GOTERM_BP_DIRECT	GO:0043407~negative regulation of MAP kinase activity	0.0320118	ENSG00000120129, ENSG00000196712, ENSG00000116741	10.601	1	0.385105	0.373792
219	GOTERM_BP_DIRECT	GO:0007565~female pregnancy	0.0324229	ENSG00000115461, ENSG00000185591, ENSG00000185499, ENSG00000087460	5.7174	1	0.387139	0.375767
220	KEGG_PATHWAY	hsa04922:Glucagon signaling pathway	0.0324543	ENSG00000067225, ENSG00000118260, ENSG00000142208, ENSG00000186951, ENSG00000087460	4.08734	0.996993	0.129817	0.102526
221	GOTERM_BP_DIRECT	GO:0045786~negative regulation of cell cycle	0.0336714	ENSG00000143878, ENSG00000105810, ENSG00000107485	10.3145	1	0.399068	0.387345
222	KEGG_PATHWAY	hsa05166:HTLV-I infection	0.0349417	ENSG00000110092, ENSG00000175387, ENSG00000101966, ENSG00000118260, ENSG00000142208, ENSG00000145675, ENSG00000136997, ENSG00000124762	2.54896	0.998088	0.136661	0.107931
223	KEGG_PATHWAY	hsa04390:Hippo signaling pathway	0.0368591	ENSG00000110092, ENSG00000118523, ENSG00000175387, ENSG00000166913, ENSG00000164924, ENSG00000136997	3.21574	0.998653	0.141026	0.111379
224	GOTERM_BP_DIRECT	GO:0000079~regulation of cyclin-dependent protein serine/threonine kinase activity	0.0370887	ENSG00000113328, ENSG00000171862, ENSG00000124762	9.78555	1	0.431563	0.418885
225	GOTERM_BP_DIRECT	GO:0046854~phosphatidylinositol phosphorylation	0.0372223	ENSG00000065361, ENSG00000177885, ENSG00000141736, ENSG00000145675	5.41328	1	0.431563	0.418885
226	GOTERM_BP_DIRECT	GO:0006614~SRP-dependent cotranslational protein targeting to membrane	0.0372223	ENSG00000114391, ENSG00000186468, ENSG00000105372, ENSG00000177954	5.41328	1	0.431563	0.418885
227	GOTERM_MF_DIRECT	GO:0003924~GTPase activity	0.037859	ENSG00000143878, ENSG00000123416, ENSG00000156508, ENSG00000167658, ENSG00000111540, ENSG00000087460	3.2302	1	0.348655	0.326644
228	GOTERM_BP_DIRECT	GO:0030336~negative regulation of cell migration	0.0382235	ENSG00000115461, ENSG00000143878, ENSG00000171862, ENSG00000196712	5.3563	1	0.432758	0.420046
229	GOTERM_BP_DIRECT	GO:0036035~osteoclast development	0.0384073	ENSG00000007168, ENSG00000114861	50.8848	1	0.432758	0.420046
230	GOTERM_BP_DIRECT	GO:0030823~regulation of cGMP metabolic process	0.0384073	ENSG00000112715, ENSG00000137801	50.8848	1	0.432758	0.420046
231	GOTERM_BP_DIRECT	GO:0031325~positive regulation of cellular metabolic process	0.0384073	ENSG00000169710, ENSG00000131473	50.8848	1	0.432758	0.420046
232	GOTERM_MF_DIRECT	GO:0043559~insulin binding	0.0387821	ENSG00000145675, ENSG00000140443	50.391	1	0.349039	0.327003
233	GOTERM_BP_DIRECT	GO:0043280~positive regulation of cysteine-type endopeptidase activity involved in apoptotic process	0.0388453	ENSG00000118523, ENSG00000153094, ENSG00000136997	9.54091	1	0.434633	0.421865
234	GOTERM_BP_DIRECT	GO:0007169~transmembrane receptor protein tyrosine kinase signaling pathway	0.0392384	ENSG00000065361, ENSG00000148053, ENSG00000141736, ENSG00000140443	5.30051	1	0.435983	0.423176
235	GOTERM_MF_DIRECT	GO:0004867~serine-type endopeptidase inhibitor activity	0.0412699	ENSG00000084234, ENSG00000142192, ENSG00000149257, ENSG00000003436	5.19495	1	0.363175	0.340247
236	GOTERM_BP_DIRECT	GO:0007229~integrin-mediated signaling pathway	0.0423649	ENSG00000118523, ENSG00000150093, ENSG00000100345, ENSG00000179051	5.13988	1	0.452815	0.439514
237	GOTERM_BP_DIRECT	GO:0007595~lactation	0.0424514	ENSG00000110092, ENSG00000112715, ENSG00000118260	9.08658	1	0.452815	0.439514
238	GOTERM_BP_DIRECT	GO:0006986~response to unfolded protein	0.0424514	ENSG00000149257, ENSG00000137801, ENSG00000109971	9.08658	1	0.452815	0.439514
239	GOTERM_BP_DIRECT	GO:0035338~long-chain fatty-acyl-CoA biosynthetic process	0.0424514	ENSG00000169710, ENSG00000099194, ENSG00000131473	9.08658	1	0.452815	0.439514
240	GOTERM_BP_DIRECT	GO:0001541~ovarian follicle development	0.0424514	ENSG00000112715, ENSG00000136997, ENSG00000157227	9.08658	1	0.452815	0.439514
241	GOTERM_BP_DIRECT	GO:0045599~negative regulation of fat cell differentiation	0.0424514	ENSG00000069667, ENSG00000172201, ENSG00000107485	9.08658	1	0.452815	0.439514
242	GOTERM_MF_DIRECT	GO:0031072~heat shock protein binding	0.0432142	ENSG00000204388, ENSG00000096060, ENSG00000109971	8.9984	1	0.372018	0.348532
243	GOTERM_BP_DIRECT	GO:0010468~regulation of gene expression	0.0434341	ENSG00000105810, ENSG00000185650, ENSG00000136997, ENSG00000196712	5.08848	1	0.460229	0.44671
244	GOTERM_BP_DIRECT	GO:0045429~positive regulation of nitric oxide biosynthetic process	0.0442998	ENSG00000136826, ENSG00000091831, ENSG00000142208	8.87526	1	0.462	0.448429
245	GOTERM_BP_DIRECT	GO:0042593~glucose homeostasis	0.0445168	ENSG00000115461, ENSG00000168610, ENSG00000121671, ENSG00000142208	5.0381	1	0.462	0.448429
246	GOTERM_BP_DIRECT	GO:0016477~cell migration	0.0458052	ENSG00000118523, ENSG00000150093, ENSG00000137801, ENSG00000171862, ENSG00000135862	3.69803	1	0.462	0.448429
247	GOTERM_BP_DIRECT	GO:0046777~protein autophosphorylation	0.0458052	ENSG00000099875, ENSG00000148053, ENSG00000141736, ENSG00000142208, ENSG00000140443	3.69803	1	0.462	0.448429
248	GOTERM_BP_DIRECT	GO:0001957~intramembranous ossification	0.0459112	ENSG00000108821, ENSG00000087245	42.404	1	0.462	0.448429
249	GOTERM_BP_DIRECT	GO:0032964~collagen biosynthetic process	0.0459112	ENSG00000108821, ENSG00000149257	42.404	1	0.462	0.448429
250	GOTERM_BP_DIRECT	GO:0007182~common-partner SMAD protein phosphorylation	0.0459112	ENSG00000175387, ENSG00000115306	42.404	1	0.462	0.448429
251	GOTERM_BP_DIRECT	GO:2001171~positive regulation of ATP biosynthetic process	0.0459112	ENSG00000168610, ENSG00000136997	42.404	1	0.462	0.448429
252	GOTERM_MF_DIRECT	GO:0055131~C3HC4-type RING finger domain binding	0.0463574	ENSG00000204388, ENSG00000109971	41.9925	1	0.376593	0.352818
253	GOTERM_MF_DIRECT	GO:0005168~neurotrophin TRKA receptor binding	0.0463574	ENSG00000177885, ENSG00000145675	41.9925	1	0.376593	0.352818
254	GOTERM_MF_DIRECT	GO:0003713~transcription coactivator activity	0.0465986	ENSG00000147649, ENSG00000148516, ENSG00000177463, ENSG00000181163, ENSG00000150347, ENSG00000107485	3.04785	1	0.376593	0.352818
255	GOTERM_BP_DIRECT	GO:0006412~translation	0.0482732	ENSG00000114391, ENSG00000186468, ENSG00000148730, ENSG00000142208, ENSG00000105372, ENSG00000177954	3.01689	1	0.482732	0.468551
256	GOTERM_MF_DIRECT	GO:0019902~phosphatase binding	0.048941	ENSG00000175387, ENSG00000121671, ENSG00000186951	8.39851	1	0.387613	0.363142
257	GOTERM_BP_DIRECT	GO:0051091~positive regulation of sequence-specific DNA binding transcription factor activity	0.048981	ENSG00000091831, ENSG00000150347, ENSG00000142208, ENSG00000171862	4.84618	1	0.486768	0.472469
