# Supplementary material for: Network based multifactorial modelling of miRNA-target interactions
Source: PeerJ. 2021 Mar 19;9:e11121. doi: 10.7717/peerj.11121 (PMC7983860; doi:10.7717/peerj.11121)
Supplement: Supplemental Information 4 — Functional annotations of genes that were found to be highly perturbing in tumor tissues only. The networks of breast cancer samples were constructed through miRTaRBase database. [file peerj-09-11121-s004.xlsx]

## Sheet: mirtarbase_tumor_specific_terms
	category	term	p_value	genes	fold_enrichment	bonferroni	benjamini	fdr
1	KEGG_PATHWAY	hsa05206:MicroRNAs in cancer	2.75855e-05	ENSG00000110092, ENSG00000112715, ENSG00000134250, ENSG00000105810, ENSG00000165119, ENSG00000130816, ENSG00000137801	9.90395	0.00267226	0.00257041	0.00233192
2	GOTERM_BP_DIRECT	GO:0043066~negative regulation of apoptotic process	4.37603e-05	ENSG00000112715, ENSG00000134250, ENSG00000181163, ENSG00000165119, ENSG00000137801, ENSG00000170540, ENSG00000140443	9.93609	0.020872	0.0210924	0.0209174
3	KEGG_PATHWAY	hsa04510:Focal adhesion	7.65412e-05	ENSG00000110092, ENSG00000112715, ENSG00000187498, ENSG00000137801, ENSG00000204262, ENSG00000140443	11.7858	0.00739729	0.00257041	0.00233192
4	KEGG_PATHWAY	hsa04151:PI3K-Akt signaling pathway	7.94972e-05	ENSG00000110092, ENSG00000112715, ENSG00000187498, ENSG00000105810, ENSG00000137801, ENSG00000204262, ENSG00000140443	8.21023	0.00768188	0.00257041	0.00233192
5	GOTERM_MF_DIRECT	GO:0005515~protein binding	9.74854e-05	ENSG00000112715, ENSG00000108639, ENSG00000105810, ENSG00000175387, ENSG00000104447, ENSG00000181163, ENSG00000104419, ENSG00000170540, ENSG00000137801, ENSG00000171940, ENSG00000116741, ENSG00000110092, ENSG00000187498, ENSG00000143878, ENSG00000134250, ENSG00000185499, ENSG00000100345, ENSG00000186468, ENSG00000148730, ENSG00000179051, ENSG00000165119, ENSG00000130816, ENSG00000140443, ENSG0000…	1.70806	0.0137482	0.0138429	0.0138429
6	KEGG_PATHWAY	hsa05200:Pathways in cancer	0.000164111	ENSG00000110092, ENSG00000112715, ENSG00000187498, ENSG00000105810, ENSG00000175387, ENSG00000140443, ENSG00000087460	7.20745	0.015794	0.0039797	0.00361045
7	KEGG_PATHWAY	hsa05212:Pancreatic cancer	0.000413051	ENSG00000110092, ENSG00000112715, ENSG00000105810, ENSG00000175387	24.9014	0.0392819	0.00801319	0.0072697
8	GOTERM_BP_DIRECT	GO:0010595~positive regulation of endothelial cell migration	0.00211583	ENSG00000112715, ENSG00000143878, ENSG00000137801	42.1204	0.639732	0.251576	0.249488
9	GOTERM_BP_DIRECT	GO:0071230~cellular response to amino acid stimulus	0.00220785	ENSG00000187498, ENSG00000130816, ENSG00000204262	41.2242	0.655396	0.251576	0.249488
10	GOTERM_BP_DIRECT	GO:0008285~negative regulation of cell proliferation	0.00260237	ENSG00000134250, ENSG00000105810, ENSG00000175387, ENSG00000181163, ENSG00000104419	8.15462	0.715203	0.251576	0.249488
11	GOTERM_BP_DIRECT	GO:0001701~in utero embryonic development	0.00260971	ENSG00000112715, ENSG00000175387, ENSG00000100345, ENSG00000185499	13.8149	0.71621	0.251576	0.249488
12	GOTERM_BP_DIRECT	GO:0000122~negative regulation of transcription from RNA polymerase II promoter	0.00371528	ENSG00000110092, ENSG00000112715, ENSG00000175387, ENSG00000104447, ENSG00000130816, ENSG00000171940	5.38205	0.833723	0.291023	0.288608
13	KEGG_PATHWAY	hsa05219:Bladder cancer	0.00394514	ENSG00000110092, ENSG00000112715, ENSG00000137801	29.6083	0.318484	0.0637797	0.057862
14	GOTERM_BP_DIRECT	GO:0043154~negative regulation of cysteine-type endopeptidase activity involved in apoptotic process	0.00469653	ENSG00000112715, ENSG00000137801, ENSG00000170540	28.0803	0.89659	0.291023	0.288608
15	GOTERM_BP_DIRECT	GO:0030855~epithelial cell differentiation	0.00483026	ENSG00000112715, ENSG00000187498, ENSG00000185499	27.6791	0.903076	0.291023	0.288608
16	GOTERM_BP_DIRECT	GO:0030823~regulation of cGMP metabolic process	0.00742277	ENSG00000112715, ENSG00000137801	258.338	0.972433	0.397531	0.394232
17	KEGG_PATHWAY	hsa05214:Glioma	0.00968727	ENSG00000110092, ENSG00000105810, ENSG00000140443	18.676	0.611027	0.103232	0.0936536
18	KEGG_PATHWAY	hsa05205:Proteoglycans in cancer	0.0102503	ENSG00000110092, ENSG00000112715, ENSG00000137801, ENSG00000140443	8.09294	0.631903	0.103232	0.0936536
19	KEGG_PATHWAY	hsa04115:p53 signaling pathway	0.0102696	ENSG00000110092, ENSG00000105810, ENSG00000137801	18.1185	0.632598	0.103232	0.0936536
20	KEGG_PATHWAY	hsa05218:Melanoma	0.01148	ENSG00000110092, ENSG00000105810, ENSG00000140443	17.0978	0.673719	0.103232	0.0936536
21	KEGG_PATHWAY	hsa04015:Rap1 signaling pathway	0.0117067	ENSG00000112715, ENSG00000137801, ENSG00000140443, ENSG00000087460	7.70756	0.680899	0.103232	0.0936536
22	GOTERM_BP_DIRECT	GO:0045766~positive regulation of angiogenesis	0.0125859	ENSG00000112715, ENSG00000143878, ENSG00000137801	16.8482	0.997768	0.606642	0.601608
23	KEGG_PATHWAY	hsa05222:Small cell lung cancer	0.0161832	ENSG00000110092, ENSG00000187498, ENSG00000105810	14.2817	0.794563	0.126194	0.114486
24	GOTERM_MF_DIRECT	GO:0000978~RNA polymerase II core promoter proximal region sequence-specific DNA binding	0.0167572	ENSG00000175387, ENSG00000185499, ENSG00000165119, ENSG00000171940	7.04476	0.909254	1	1
25	KEGG_PATHWAY	hsa04512:ECM-receptor interaction	0.0169127	ENSG00000187498, ENSG00000137801, ENSG00000204262	13.9533	0.808824	0.126194	0.114486
26	GOTERM_BP_DIRECT	GO:0007050~cell cycle arrest	0.01851	ENSG00000134250, ENSG00000105810, ENSG00000137801	13.7414	0.999877	0.747802	0.741596
27	GOTERM_BP_DIRECT	GO:0032026~response to magnesium ion	0.0191893	ENSG00000110092, ENSG00000137801	99.3609	0.999912	0.747802	0.741596
28	GOTERM_BP_DIRECT	GO:0051895~negative regulation of focal adhesion assembly	0.0235671	ENSG00000179051, ENSG00000137801	80.7308	0.99999	0.747802	0.741596
29	KEGG_PATHWAY	hsa05146:Amoebiasis	0.0245218	ENSG00000187498, ENSG00000204262, ENSG00000087460	11.4523	0.910029	0.169901	0.154137
30	GOTERM_BP_DIRECT	GO:0030224~monocyte differentiation	0.0250222	ENSG00000112715, ENSG00000100345	75.9819	0.999995	0.747802	0.741596
31	GOTERM_BP_DIRECT	GO:0060749~mammary gland alveolus development	0.0250222	ENSG00000110092, ENSG00000112715	75.9819	0.999995	0.747802	0.741596
32	GOTERM_BP_DIRECT	GO:0010971~positive regulation of G2/M transition of mitotic cell cycle	0.0264753	ENSG00000110092, ENSG00000179051	71.7607	0.999998	0.747802	0.741596
33	GOTERM_BP_DIRECT	GO:0001666~response to hypoxia	0.0268177	ENSG00000112715, ENSG00000185499, ENSG00000137801	11.2648	0.999998	0.747802	0.741596
34	GOTERM_MF_DIRECT	GO:0044822~poly(A) RNA binding	0.0268916	ENSG00000100345, ENSG00000186468, ENSG00000181163, ENSG00000179051, ENSG00000165119, ENSG00000149257	3.3227	0.97916	1	1
35	GOTERM_BP_DIRECT	GO:0043536~positive regulation of blood vessel endothelial cell migration	0.0279262	ENSG00000112715, ENSG00000137801	67.9838	0.999999	0.747802	0.741596
36	GOTERM_BP_DIRECT	GO:0030335~positive regulation of cell migration	0.0303714	ENSG00000112715, ENSG00000137801, ENSG00000140443	10.5301	1	0.748449	0.742238
37	GOTERM_BP_DIRECT	GO:0008284~positive regulation of cell proliferation	0.031056	ENSG00000112715, ENSG00000181163, ENSG00000137801, ENSG00000140443	5.54374	1	0.748449	0.742238
38	KEGG_PATHWAY	hsa04110:Cell cycle	0.032798	ENSG00000110092, ENSG00000105810, ENSG00000175387	9.78985	0.96063	0.212094	0.192415
39	GOTERM_BP_DIRECT	GO:0030198~extracellular matrix organization	0.0341029	ENSG00000187498, ENSG00000137801, ENSG00000204262	9.8854	1	0.782743	0.776247
40	GOTERM_BP_DIRECT	GO:0006306~DNA methylation	0.0365884	ENSG00000130816, ENSG00000087460	51.6677	1	0.801618	0.794965
41	KEGG_PATHWAY	hsa04068:FoxO signaling pathway	0.037812	ENSG00000110092, ENSG00000175387, ENSG00000140443	9.05926	0.97622	0.229235	0.207966
42	GOTERM_MF_DIRECT	GO:0001968~fibronectin binding	0.039312	ENSG00000112715, ENSG00000137801	48.094	0.996637	1	1
43	GOTERM_MF_DIRECT	GO:0050840~extracellular matrix binding	0.039312	ENSG00000112715, ENSG00000137801	48.094	0.996637	1	1
44	GOTERM_BP_DIRECT	GO:0001569~patterning of blood vessels	0.0408916	ENSG00000112715, ENSG00000187498	46.1319	1	0.856946	0.849834
45	GOTERM_BP_DIRECT	GO:0001525~angiogenesis	0.0431131	ENSG00000112715, ENSG00000143878, ENSG00000100345	8.68851	1	0.865854	0.858668
46	GOTERM_BP_DIRECT	GO:0048701~embryonic cranial skeleton morphogenesis	0.0451764	ENSG00000175387, ENSG00000087460	41.6675	1	0.871001	0.863773
47	KEGG_PATHWAY	hsa04921:Oxytocin signaling pathway	0.0464092	ENSG00000110092, ENSG00000116741, ENSG00000087460	8.09294	0.990043	0.264805	0.240236
